# Supplementary material for: fNIRS-EEG BCIs for Motor Rehabilitation: A Review
Source: MDPI journal article supplement (doi:10.3390/bioengineering10121393), 2023-12-06
Supplement: s1 [file s1]

# fNIRS-EEG BCIs for Motor Rehabilitation: A Review

Jianan Chen<sup>†</sup>, Yunjia Xia<sup>†</sup>, Xinkai Zhou, Ernesto Vital, Alexander Thomas, Rui Loureiro, Robert Cooper, Tom Carlson, Hubin Zhao<sup>\*</sup>

<sup>\*</sup> Correspondence: Hubin Zhao: hubin.zhao@ucl.ac.uk

## 1. Supplementary Tables

**Supplementary Table S1.** Signal pre-processing pipelines in reviewed fNIRS-based BCI studies

| Author/Years<br>(★clinical)       | Pre-processing                                                                                                                                                                                                                                         |
|-----------------------------------|--------------------------------------------------------------------------------------------------------------------------------------------------------------------------------------------------------------------------------------------------------|
| ★Holper et al., 2010 [29]         | <ul style="list-style-type: none"> <li>7<sup>th</sup> order Chebyshev low-pass</li> </ul>                                                                                                                                                              |
| Schurholz et al., 2012 [30]       | <ul style="list-style-type: none"> <li>Wavelet-MDL;</li> <li>zero-phase Chebyshev type II low-pass filter (0.5 dB ripple, 40</li> </ul>                                                                                                                |
| Zimmermann et al., 2013 [31]      | <ul style="list-style-type: none"> <li>2<sup>nd</sup> order Chebyshev type II low-pass filter (40 dB attenuation, 0.5</li> </ul>                                                                                                                       |
| Thanh Hai et al., 2013 [32]       | <ul style="list-style-type: none"> <li>Savitzky–Golay filter</li> </ul>                                                                                                                                                                                |
| ★ Rea et al., 2014 [33]           | <ul style="list-style-type: none"> <li>wavelet-MDL;</li> <li>Gaussian low pass filter with 4-</li> </ul>                                                                                                                                               |
| ★ Lee et al., 2017 [34]           | <ul style="list-style-type: none"> <li>4<sup>th</sup> order Butterworth band-pass</li> </ul>                                                                                                                                                           |
| Trakoolwilaiwan et al., 2017 [35] | <ul style="list-style-type: none"> <li>DWT;</li> <li>10-level wavelet decomposition with a Daubechies mother func-</li> </ul>                                                                                                                          |
| ★ Khan et al., 2018 [36]          | <p>Implemented 6 different filters for performance comparison:</p> <ul style="list-style-type: none"> <li>Kalman Filter;</li> <li>Wiener Filter;</li> <li>Gaussian Filter;</li> <li>Hemodynamic response filter;</li> <li>Band-pass filter;</li> </ul> |
| ★ Lee et al., 2019 [37]           | <ul style="list-style-type: none"> <li>MACD filter</li> </ul>                                                                                                                                                                                          |
| A et al., 2020 [38]               | <ul style="list-style-type: none"> <li>4<sup>th</sup> order Butterworth band-pass filter (0.01–0.2 Hz);</li> </ul>                                                                                                                                     |
| ★ Hamid et al., 2022 [39]         | <ul style="list-style-type: none"> <li>low-pass filter (0.5 Hz);</li> <li>high-pass filter (0.01 Hz)</li> </ul>                                                                                                                                        |

**Supplementary Table S2.** Signal pre-processing pipelines in reviewed fNIRS-EEG-based BCI studies

| Author/Years<br>(★clinical)     | fNIRS Pre-processing                                                                                                                   | EEG Pre-processing                                                                                                                                                                   |
|---------------------------------|----------------------------------------------------------------------------------------------------------------------------------------|--------------------------------------------------------------------------------------------------------------------------------------------------------------------------------------|
| Leamy et al., 2011<br>[23]      | <ul style="list-style-type: none"> <li>low-pass filter (0.5 Hz);</li> <li>high-pass filter (0.01 Hz)</li> </ul>                        | <ul style="list-style-type: none"> <li>high-pass filter (1 Hz)</li> </ul>                                                                                                            |
| Fazli et al., 2012 [24]         | <ul style="list-style-type: none"> <li>3<sup>rd</sup> order Butterworth low-pass filter</li> </ul>                                     | <ul style="list-style-type: none"> <li>band-pass filter;</li> <li>CSP-based filter</li> </ul>                                                                                        |
| ★ Khan et al., 2014<br>[40]     | <ul style="list-style-type: none"> <li>Gaussian low-pass filter;</li> <li>wavelet transform</li> </ul>                                 | <ul style="list-style-type: none"> <li>band-pass filter (4-35 Hz)</li> </ul>                                                                                                         |
| Jawad Khan et al.,<br>2014 [41] | <ul style="list-style-type: none"> <li>Gaussian low-pass filter;</li> <li>wavelet transform</li> </ul>                                 | <ul style="list-style-type: none"> <li>band-pass filter</li> </ul>                                                                                                                   |
| Koo et al., 2015 [42]           | <ul style="list-style-type: none"> <li>EMA filter</li> </ul>                                                                           | <ul style="list-style-type: none"> <li>Butterworth filter;</li> <li>CSP-based filter</li> </ul>                                                                                      |
| Yin et al., 2015 [43]           | <ul style="list-style-type: none"> <li>5<sup>th</sup> order Chebyshev type II low-pass filter (0.1 Hz)</li> </ul>                      | <ul style="list-style-type: none"> <li>5<sup>th</sup> order Chebyshev type II low-pass filter (125 Hz);</li> <li>band-pass filter (5 to 45 Hz);</li> <li>Laplacian filter</li> </ul> |
| Buccino et al., 2016<br>[44]    | <ul style="list-style-type: none"> <li>4<sup>th</sup> order IIR Butterworth filter (0.01-0.2 Hz);</li> <li>High-pass filter</li> </ul> | <ul style="list-style-type: none"> <li>4<sup>th</sup> order IIR Butterworth band-pass filter</li> </ul>                                                                              |
| Li et al., 2017 [45]            | <ul style="list-style-type: none"> <li>4<sup>th</sup> order Butterworth band-pass filter (0.01-0.2 Hz)</li> </ul>                      | <ul style="list-style-type: none"> <li>3<sup>rd</sup> order Butterworth band-pass filter (1-45 Hz)</li> </ul>                                                                        |
| Chiarelli et al., 2018<br>[46]  | -                                                                                                                                      | <ul style="list-style-type: none"> <li>zero-phase 2<sup>nd</sup> order Digital Butterworth filter (8-30Hz)</li> </ul>                                                                |
| ★ Wang et al., 2019<br>[47]     | <ul style="list-style-type: none"> <li>band-pass filter (0.01-0.2 Hz);</li> <li>moving average outlier removal</li> </ul>              | <ul style="list-style-type: none"> <li>band-pass filter (0.5-100 Hz);</li> <li>band-stop filter (50 Hz);</li> <li>CAR</li> </ul>                                                     |
| Ghonchi et al., 2020<br>[48]    | <ul style="list-style-type: none"> <li>band-pass filter (0.01-0.5Hz)</li> </ul>                                                        | <ul style="list-style-type: none"> <li>band-pass filter (0.5-35Hz)</li> </ul>                                                                                                        |
| Chen et al., 2022 [49]          | <ul style="list-style-type: none"> <li>band-pass filter (0.01-0.2Hz)</li> </ul>                                                        | <ul style="list-style-type: none"> <li>3<sup>rd</sup>-order Butterworth filter (0.5-35Hz)</li> </ul>                                                                                 |

**Disclaimer/Publisher's Note:** The statements, opinions and data contained in all publications are solely those of the individual author(s) and contributor(s) and not of MDPI and/or the editor(s). MDPI and/or the editor(s) disclaim responsibility for any injury to people or property resulting from any ideas, methods, instructions or products referred to in the content.
